# Supplementary material
Source: PubMed Central journal article supplement (PMC5836367)
Supplement: supp_RA117.000165_4763_1_supp_27311_5zsw5x.pdf [file supp_RA117.000165_4763_1_supp_27311_5zsw5x.pdf]

**Table S1.** Key outlining base datafile names of sample replicates at ProteomeXchange with sample designations used in this study.

| <b>Sample</b> | <b>Base filename</b> | <b>MS/MS Method</b> | <b>MS/MS Viewer<br/>(pdResult / byrslt)<sup>1</sup></b> |
|---------------|----------------------|---------------------|---------------------------------------------------------|
| WT_Ros-1      | 160713_Wei_4B        | HCD → ETD repeat    | Yes / Yes                                               |
|               | 160713_Wei_4         | ETD only            | Yes / Yes                                               |
|               | 160601_Wei1          | HCD → ETD           | Yes / Yes                                               |
| WT_Ros-2      | 160713_Wei_5         | ETD only            | Yes / Yes                                               |
|               | 160601_Wei2          | HCD → ETD           | Yes / Yes                                               |
| WT_Ros-3      | 160713_Wei_6B        | HCD → ETD repeat    | Yes / Yes                                               |
|               | 160713_Wei_6         | ETD only            | Yes / Yes                                               |
|               | 160601_Wei_3         | HCD → ETD           | Yes / Yes                                               |
| WT_Ros-4      | 160610_Wei_16        | HCD → ETD           | Yes / Yes                                               |
| WT_Ros-5      | 160610_Wei_17        | HCD → ETD           | Yes / Yes                                               |
| WT_Ros-6      | 160610_Wei_18        | HCD → ETD           | Yes / Yes                                               |
| WT_Flower     | 160913_Wei_F70       | HCD → ETD repeat 2  | Yes / Yes                                               |
|               | 160913_Wei_F60       | HCD → ETD repeat    | Yes / Yes                                               |
|               | 160913_Wei_F50       | HCD → ETD           | Yes / Yes                                               |
| WT_Stem       | 160913_Wei_570       | HCD → ETD repeat 2  | Yes / Yes                                               |
|               | 160913_Wei_560       | HCD → ETD repeat    | Yes / Yes                                               |
|               | 160913_Wei_550       | HCD → ETD           | Yes / Yes                                               |
| xylt_Ros-1    | 160713_Wei_1B        | HCD → ETD repeat    | Yes / Yes                                               |
|               | 160713_Wei_1         | ETD only            | Yes / Yes                                               |
|               | 160601_Wei4          | HCD → ETD           | Yes / Yes                                               |
| xylt_Ros-2    | 160713_Wei_2         | ETD only            | Yes / Yes                                               |
|               | 160601_Wei5          | HCD → ETD           | Yes / Yes                                               |
| xylt_Ros-3    | 160601_Wei6          | HCD → ETD           | Yes / Yes                                               |
|               | 160713_Wei_3         | ETD only            | Yes / Yes                                               |

<sup>1</sup>Annotated spectra can be viewed for all matched data in Table S3 using the Proteome Discoverer Viewer (.pdResult) or Byonic Viewer (.byrslt).
