# Supplementary material
Source: PubMed Central journal article supplement (PMC5836367)
Supplement: supp_RA117.000165_4763_1_supp_27319_fzswfy.pdf [file supp_RA117.000165_4763_1_supp_27319_fzswfy.pdf]

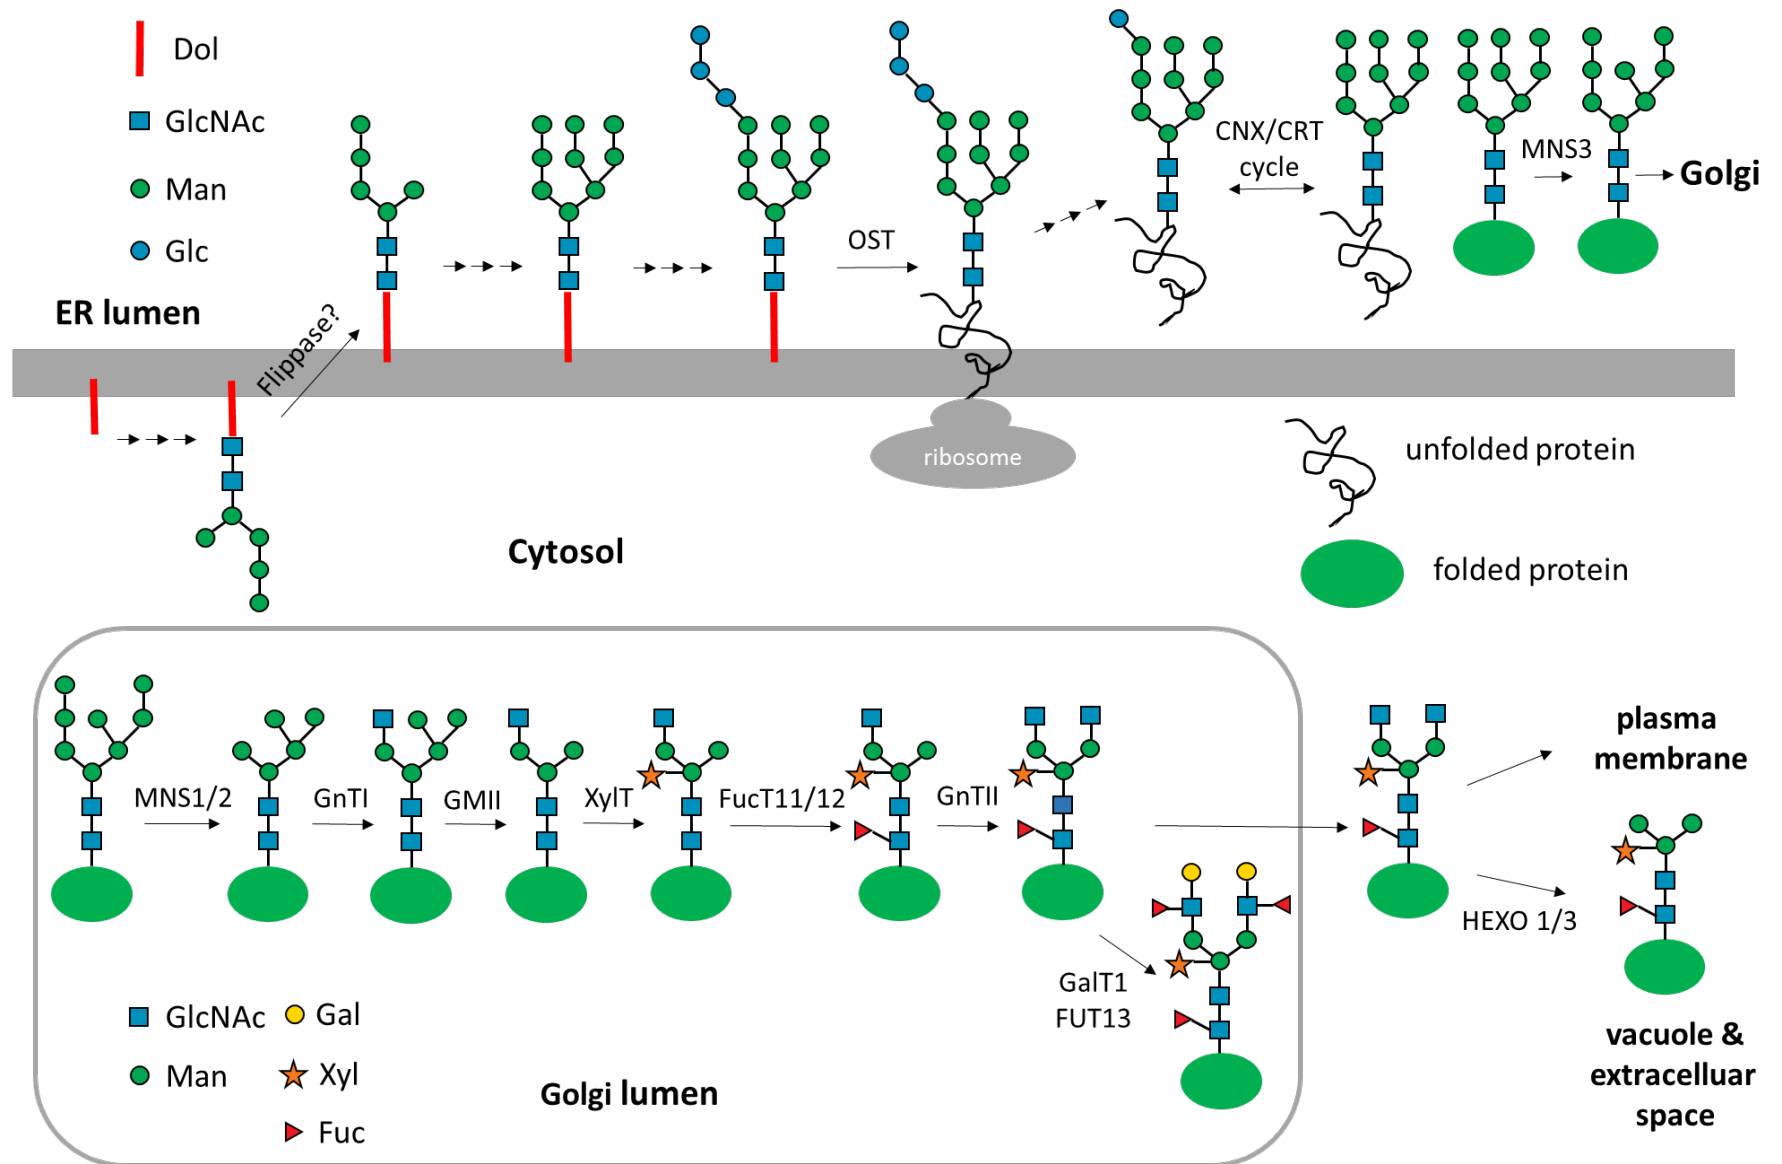

**Figure S1.** Schematic diagram outlining the *N*-glycan biosynthesis pathway in ER and Golgi apparatus of plants. The red arrow indicates where we could refine the *N*-glycan biosynthetic model from our data. Dol: dolichol, OST: oligosaccharyltransferase, CNX/CRT cycle: calnexin/calreticulin (CNX/CRT) cycle, MNS: α-mannosidase, GnT: 1,2-*N*-acetylglucosaminyltransferase, FucT: fucosyltransferase, XylT: xylosyltransferase, GM: α-mannosidase, HEXO: β-*N*-acetylhexosaminidase, GalT: galactosyltransferase.
