# Supplementary material
Source: PubMed Central journal article supplement (PMC5836367)
Supplement: supp_RA117.000165_4763_1_supp_27320_bzswby.pdf [file supp_RA117.000165_4763_1_supp_27320_bzswby.pdf]

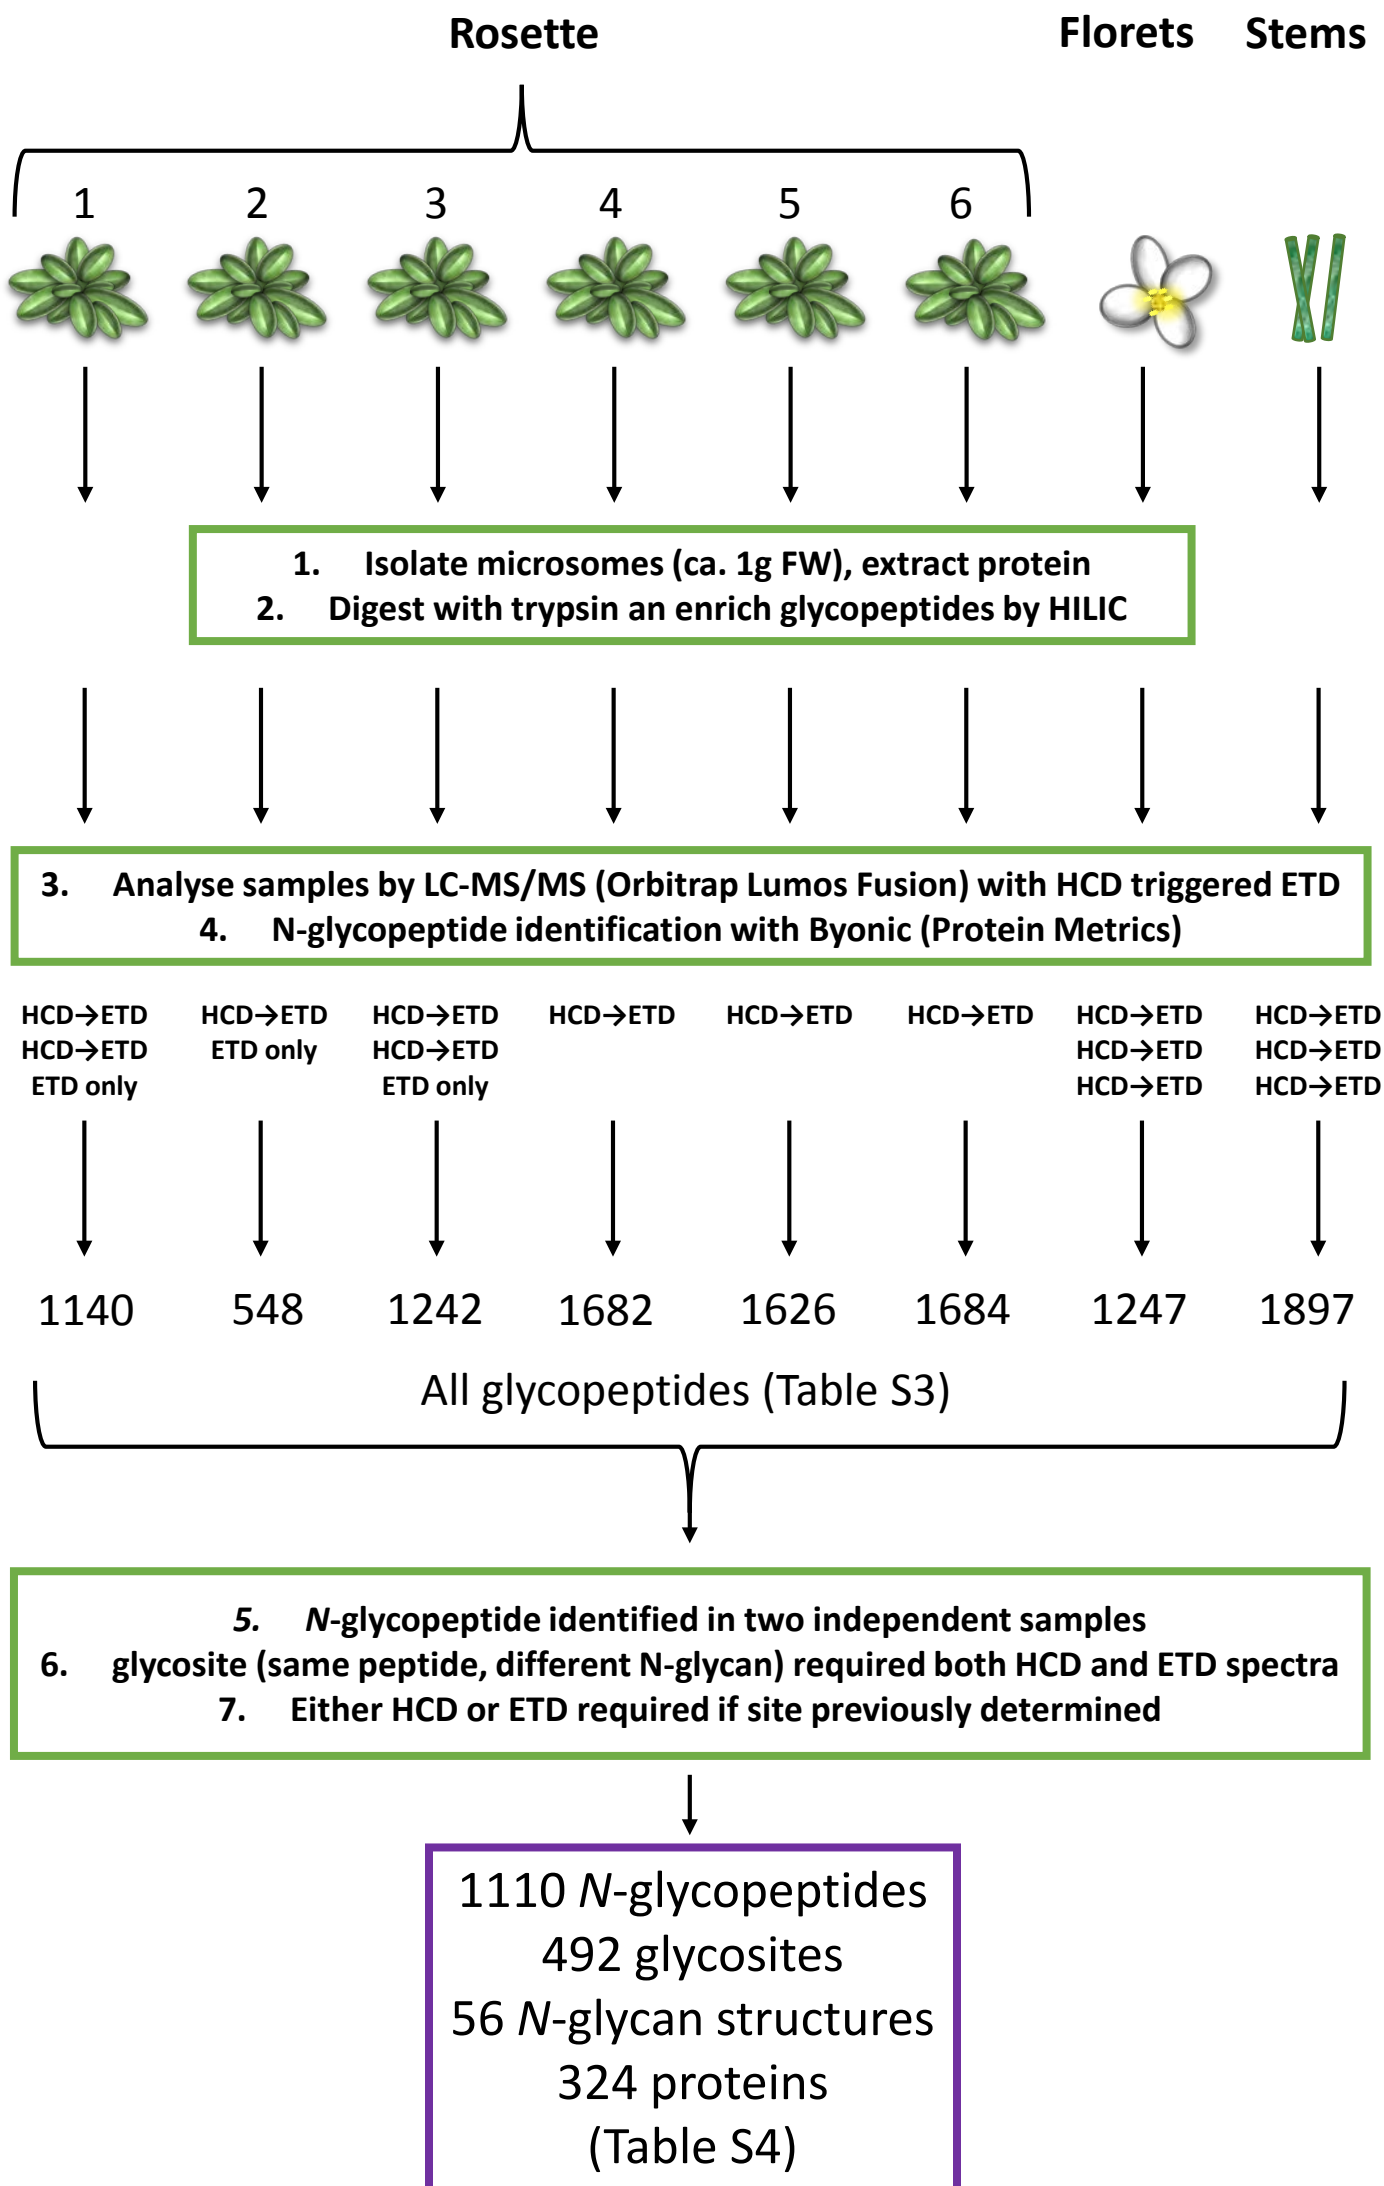

**Figure S2.** Workflow outlining wildtype sample N-glycopeptide enrichment procedure and replicates detailing number of matches per sample and integration of data. Some biological replicates were analysed multiple times (technical repeats) using either HCD triggered ETD (HCD→ETD) and/or ETD only in an attempt to generate more ETD data and increase confidence of spectral matching. Sample WT\_Ros-2 generated fewer PSMs due to MS sensitivity issues.
